# Supplementary material for: In Silico Analysis of Bioactive Peptides Released from Giant Grouper (Epinephelus lanceolatus) Roe Proteins Identified by Proteomics Approach
Source: PubMed Central journal article supplement (PMC6278403; doi:10.3390/molecules23112910), 2018-11-08
Supplement: molecules-23-02910-s001.pdf [file molecules-23-02910-s001.pdf]

**In silico analysis of bioactive peptides released from giant grouper (*Epinephelus lanceolatus*) roe proteins identified by proteomics approach**

Fenny Crista A. Panjaitan <sup>1</sup>, Honey Lyn R. Gomez <sup>2</sup>, Yu-Wei Chang <sup>1,\*</sup>

<sup>1</sup>Department of Food Science, National Taiwan Ocean University, Keelung 202, Taiwan

<sup>2</sup>Institute of Fish Processing Technology, College of Fisheries and Ocean Sciences, University of the Philippines Visayas, Miagao 5023, Iloilo, Philippines

\*Corresponding author

**Supplementary Figure S1**

**Figure S1.** Amino acid sequences of vitellogenin from giant grouper (*Epinephelus lanceolatus*)[1].

|       |       |       |       |       |       |       |       |       |       |      |
|-------|-------|-------|-------|-------|-------|-------|-------|-------|-------|------|
| MKAVV | LALTL | AFVAG | QNFAP | EFAAG | KTYVY | KYEAL | ILGGL | PEEGL | ARAGL | 50   |
| KISTK | LLLSA | ADQNT | YMLKL | VEPEL | SEYSG | IWPKD | PAVPA | TKLTA | ALAPQ | 100  |
| LAIFI | KFEYT | NGVVG | KVFAP | EEVST | LVLNI | YRGIL | NILQL | NIKKT | HKVYD | 150  |
| LQEVG | TQGVC | KTLYS | ISED  | RIENI | LLTKT | RDLSN | CQERL | NKDIG | LAYTE | 200  |
| KCDKC | QEETK | NLRGT | TTLSY | VLKPV | ADAVM | ILKAY | VNELI | QFSPF | SEANG | 250  |
| AAQMR | TKQSL | EFLEI | EKEPI | PSVKA | EYRHR | GSLKY | EFSDE | LLQTP | LQLIK | 300  |
| ISDAP | AQVAE | VLKHL | ATYNI | EDVHE | NAPLK | FLELV | QLLRI | ARYED | LEMYW | 350  |
| NQYKK | MSPHR | HWFLD | TIPAT | GTFAG | LRFIK | EKFMA | EEITI | AEAAQ | AFITA | 400  |
| VHMVT | ADPEV | AKLFE | SLVDS | DKVVE | NPLLR | EVVFL | GYGTM | VNKYC | NKTVD | 450  |
| CPVEL | IKPIQ | QRLSD | AIAKN | EEENI | ILYIK | VLGNA | GHPSS | FKSLT | KIMPI | 500  |
| HGTAA | VSLPM | TIHVE | AIMAL | RNIAK | KESRM | VQELA | LQLYM | DKALH | PELRM | 550  |
| LSCIV | LFETS | PSMGL | VTTVA | NSVKT | EENLQ | VASFT | YSHMK | SLSRS | PATIH | 600  |
| PDVAA | ACSAA | MKILG | TKLDR | LSLRY | SKAVH | VDLYN | SSLAV | GAAAT | AFYIN | 650  |
| DAATF | MPKSF | VAKTK | GFIAG | STAEV | LEIGA | NIEGL | QELIL | KNPAL | SESTD | 700  |
| RITKM | KRVIK | ALSEW | RSLPT | SKPLA | SVYVK | FFGQE | IGFAN | IDKPM | IDKAV | 750  |
| KFGKE | LFIQE | YGRE  | LKALL | LSGIN | FHYAK | FVLAA | EMRRI | LPTVA | GIPME | 800  |
| LSLYS | AAVAA | ASVEI | KPNTS | PRLSA | DFDVK | TLEET | DVELK | AEIRP | MVAMD | 850  |
| TYAVM | GLNTD | IFQAA | LVARA | KLHSV | VPAKI | AARLN | IKEGD | FKLEA | LPVDV | 900  |
| PENIT | SMNVT | TFAVA | RNIEE | PLVER | ITPLL | PTKVL | VPIPI | RRHTS | KLDPT | 950  |
| RNSML | DSSEL | LPME  | EDVEP | IPEYK | FRRFA | KKYCA | KHIGV | GLKAC | FKFAS | 1000 |
| QNGAS | IQDIV | LYKLA | GSHNF | SFSVT | PIEGE | VVERL | EMEVK | VGAKA | AEKLV | 1050 |
| KRINL | SEDEE | TEEGG | PVLVK | LKKIL | SSRRN | SSSSS | SSSSS | SSSSS | ESRSS | 1100 |
| RSSSS | SSSSS | SSSSR | KIDLA | ARTNS | SSSSS | SSRNS | SSSSS | SSSSS | SSSSS | 1150 |
| SSSSS | SSSSR | RSSSS | SSSSS | SSSSS | SSSSR | RVNST | RSSSS | SSRST | SASSL | 1200 |
| ASFFS | DSSSS | SSSSD | RRSKE | VMEKF | QRLHK | KMVAS | GSSAS | SVNEA | IYKEK | 1250 |
| KYLGE | EAVVA | VILRA | VKADK | RMVGY | QLGFY | LDKPN | ARVQI | IVANI | SSSDS | 1300 |
| NWRIC | ADAVV | LSKHK | VTTKI | SWGEG | CRKYS | TNVTG | ETGIV | SSSPA | ARLRV | 1350 |
| SWERL | PSTLK | RYGKM | VNKYV | PVKIL | SDLIH | TKREN | STRNI | SVIAV | ATSEK | 1400 |
| TIDII | TKTPM | SSSVY | NVKYV | PVKIL | SDLIH | TKREN | STRNI | SVIAV | ATSEK | 1450 |
| AAAAE | CSFVE | DTLYT | FNNRS | YKNKM | PSSCY | QVAAQ | DCTDE | LKFMV | LLRKD | 1500 |
| SSEQH | HINVK | ISEID | IDMFP | KDDNV | TVKVN | EMEIP | PPACL | TATQQ | LPLKI | 1550 |
| KTKRR | GLAVY | APSHG | LQEVY | FDRKT | WRIKV | ADWMK | GKTCG | LCGKA | DGEIR | 1600 |
| QEYHT | PNGRV | AKNSI | SFAHS | WILPA | ESCRD | ASECR | LKLES | VQLEK | QLTIH | 1650 |
| GEDST | CFSVE | PVPRC | LPGCL | PVKTT | PVTVG | FSCLA | SDPQT | SVYDR | SVDLR | 1700 |
| QTTQA | HLACS | CNTKC | S     |       |       |       |       |       |       | 1716 |

Reference

1. Om, A.D.; Jasmani, S.; Ismail, N.; Yeong, S.Y.; Abol-Munafi, A.B. Application MALDI TOF on protein identification of vitellogenin in giant grouper (*Epinephelus lanceolatus*). *Fish Physiol. Biochem.* **2013**, *39*, 1277-1286, doi:<https://doi.org/10.1007/s10695-013-9782-x>.

***In silico* analysis of bioactive peptides released from giant grouper (*Epinephelus lanceolatus*) roe proteins identified by proteomics approach**

Fenny Crista A. Panjaitan <sup>1</sup>, Honey Lyn R. Gomez <sup>2</sup>, Yu-Wei Chang <sup>1,\*</sup>

<sup>1</sup> Department of Food Science, National Taiwan Ocean University, Keelung 202, Taiwan

<sup>2</sup> Institute of Fish Processing Technology, College of Fisheries and Ocean Sciences, University of the Philippines Visayas, Miagao 5023, Iloilo, Philippines

\*Corresponding author

**Supplementary Table S1**

**Table S1.** Identified tryptic peptides of vitellogenin (originated from *Epinephelus coioides*; NCBI accession number: AAW29031.1; Protein sequence coverage: 41%; 615 aa; excised from band B; accessed on 21 February 2018) in Mascot search results.

| <b>Position</b>       |                             |                        | <b>Observed</b> | <b>Mr</b>     | <b>Mr</b>     |
|-----------------------|-----------------------------|------------------------|-----------------|---------------|---------------|
| <b>Start-<br/>End</b> | <b>Peptide</b>              | <b>Modification</b>    | <b>(m/z)</b>    | <b>(expt)</b> | <b>(calc)</b> |
| 37 – 51               | K.LVEPELFEYSGVYPK.D         |                        | 885.45          | 1768.89       | 1768.89       |
| 37 – 59               | K.LVEPELFEYSGVYPKDPLVPATK.L |                        | 864.46          | 2590.36       | 2590.36       |
| 74 – 83               | K.FEYANGVVGK.V              |                        | 542.28          | 1082.54       | 1082.54       |
| 100 – 111             | R.GILNVLQLNIKK.T            |                        | 676.94          | 1351.86       | 1351.86       |
| 112 – 128             | K.TQNVYEMQEAGAQGVCK.T       | Carbamidomethyl<br>(C) | 956.93          | 1911.85       | 1911.85       |
| 129 – 138             | K.TLYAISEDEK.A              |                        | 584.79          | 1167.57       | 1167.57       |
| 129 – 141             | K.TLYAISEDEKAERI            |                        | 762.88          | 1523.75       | 1523.75       |
| 160 – 168             | K.DMGLAYTEK.C               |                        | 514.24          | 1026.47       | 1026.47       |
| 225 – 234             | K.QSLVFLEIQR.A              |                        | 616.85          | 1231.69       | 1231.69       |
| 235 – 247             | R.APIVPIQAEYLHR.G           |                        | 753.93          | 1505.84       | 1505.84       |
| 252 – 267             | K.YEFSTELLQTPIQLIK.I        |                        | 962.03          | 1922.05       | 1922.04       |
| 290 – 297             | K.VHEDAPLK.F                |                        | 454.75          | 907.48        | 907.48        |
| 298 – 306             | K.FLELIQLLR.V               |                        | 572.86          | 1143.70       | 1143.70       |
| 310 – 321             | K.FEDLEVIWSQFK.T            |                        | 770.89          | 1539.77       | 1539.76       |
| 328 – 344             | R.QWILDAIPAIGTPAALK.F       |                        | 889.52          | 1777.02       | 1777.01       |
| 390 – 397             | K.IVENPVL.R.E               |                        | 470.29          | 938.56        | 938.55        |
| 390 – 410             | K.IVENPVLREIVLLGYGTMISK.Y   | Oxidation (M)          | 787.45          | 2359.32       | 2359.32       |
| 398 – 410             | R.EIVLLGYGTMISK.Y           |                        | 712.40          | 1422.78       | 1422.78       |
| 437 – 447             | K.DETQNIILFLK.V             |                        | 667.37          | 1332.73       | 1332.73       |
| 448 – 463             | K.VLGNAGHPTSLKPITK.I        |                        | 816.98          | 1631.94       | 1631.94       |
| 479 – 488             | R.VHADAIMALR.N              |                        | 548.80          | 1095.59       | 1095.59       |
| 497 – 509             | R.MIQELALQLYMDK.A           | Oxidation (M)          | 806.41          | 1610.81       | 1610.80       |
| 562 – 575             | K.STTAIHASVAAACK.V          | Carbamidomethyl<br>(C) | 694.35          | 1386.69       | 1386.69       |

***In silico* analysis of bioactive peptides released from giant grouper (*Epinephelus lanceolatus*) roe proteins identified by proteomics approach**

Fenny Crista A. Panjaitan <sup>1</sup>, Honey Lyn R. Gomez <sup>2</sup>, Yu-Wei Chang <sup>1,\*</sup>

<sup>1</sup> Department of Food Science, National Taiwan Ocean University, Keelung 202, Taiwan

<sup>2</sup> Institute of Fish Processing Technology, College of Fisheries and Ocean Sciences, University of the Philippines Visayas, Miagao 5023, Iloilo, Philippines

\*Corresponding author

Supplementary Table S2

**Table S2.** List of bioactive peptides analyzed by BIOPEP database from vitellogenin (originated from *Epinephelus coioides*; NCBI accession number: AAW29031.1; accessed on 30 October 2018).

| BIOPEP ID | Activity      | Number of peptide | Sequence | Location                            |
|-----------|---------------|-------------------|----------|-------------------------------------|
| 2642      | ACE inhibitor | 1                 | ILP      | [464-466]                           |
| 3257      | ACE inhibitor | 2                 | RL       | [584-585],[587-588]                 |
| 3258      | ACE inhibitor | 1                 | IR       | [423-424]                           |
| 3361      | ACE inhibitor | 1                 | LKL      | [35-37]                             |
| 3379      | ACE inhibitor | 1                 | AKK      | [491-493]                           |
| 3381      | ACE inhibitor | 2                 | LY       | [130-131],[505-506]                 |
| 3384      | ACE inhibitor | 2                 | VF       | [84-85],[228-229]                   |
| 3393      | ACE inhibitor | 1                 | FAP      | [85-87]                             |
| 3489      | ACE inhibitor | 1                 | RF       | [591-592]                           |
| 3492      | ACE inhibitor | 3                 | VY       | [48-49],[97-98],[115-116]           |
| 3505      | ACE inhibitor | 1                 | VYP      | [48-50]                             |
| 3507      | ACE inhibitor | 1                 | IPA      | [334-336]                           |
| 3518      | ACE inhibitor | 1                 | VAA      | [570-572]                           |
| 3532      | ACE inhibitor | 1                 | GY       | [403-404]                           |
| 3537      | ACE inhibitor | 2                 | PR       | [495-496],[583-584]                 |
| 3539      | ACE inhibitor | 1                 | LAA      | [64-66]                             |
| 3541      | ACE inhibitor | 1                 | LSP      | [581-583]                           |
| 3550      | ACE inhibitor | 2                 | YL       | [244-245],[350-351]                 |
| 3551      | ACE inhibitor | 3                 | LF       | [42-43],[444-445],[523-524]         |
| 3553      | ACE inhibitor | 1                 | YG       | [404-405]                           |
| 3556      | ACE inhibitor | 2                 | FY       | [600-601],[614-615]                 |
| 3558      | ACE inhibitor | 1                 | LAY      | [163-165]                           |
| 3563      | ACE inhibitor | 2                 | AY       | [164-165],[325-326]                 |
| 3597      | ACE inhibitor | 1                 | AIP      | [333-335]                           |
| 3666      | ACE inhibitor | 1                 | YP       | [49-50]                             |
| 7509      | ACE inhibitor | 1                 | GLP      | [6-8]                               |
| 7513      | ACE inhibitor | 3                 | PL       | [53-54],[295-296],[604-605]         |
| 7544      | ACE inhibitor | 1                 | IW       | [316-317]                           |
| 7547      | ACE inhibitor | 1                 | IRP      | [423-425]                           |
| 7549      | ACE inhibitor | 2                 | LKP      | [189-191],[458-460]                 |
| 7558      | ACE inhibitor | 1                 | VK       | [540-541]                           |
| 7562      | ACE inhibitor | 5                 | IA       | [357-358],[365-366],[381-382],[490- |

*Supplemental file*

|      |               |   |     |                                                                                         |
|------|---------------|---|-----|-----------------------------------------------------------------------------------------|
|      |               |   |     | 491],[536-537]                                                                          |
| 7581 | ACE inhibitor | 1 | IP  | [334-335]                                                                               |
| 7582 | ACE inhibitor | 3 | RP  | [323-324],[424-425],[527-528]                                                           |
| 7583 | ACE inhibitor | 1 | AF  | [613-614]                                                                               |
| 7584 | ACE inhibitor | 3 | AP  | [86-87],[235-236],[294-295]                                                             |
| 7585 | ACE inhibitor | 7 | LA  | [12-13],[64-65],[163-164],[351-352],[430-431],[501-502],[518-519]                       |
| 7587 | ACE inhibitor | 3 | VP  | [55-56],[238-239],[368-369]                                                             |
| 7588 | ACE inhibitor | 2 | RA  | [14-15],[234-235]                                                                       |
| 7589 | ACE inhibitor | 2 | YA  | [76-77],[131-132]                                                                       |
| 7590 | ACE inhibitor | 9 | AA  | [65-66],[218-219],[341-342],[360-361],[472-473],[571-572],[572-573],[609-610],[610-611] |
| 7594 | ACE inhibitor | 2 | VG  | [81-82],[192-193]                                                                       |
| 7595 | ACE inhibitor | 1 | IG  | [337-338]                                                                               |
| 7596 | ACE inhibitor | 4 | GI  | [16-17],[89-90],[100-101],[195-196]                                                     |
| 7598 | ACE inhibitor | 4 | GA  | [122-123],[181-182],[217-218],[608-609]                                                 |
| 7599 | ACE inhibitor | 4 | GL  | [6-7],[11-12],[162-163],[531-532]                                                       |
| 7600 | ACE inhibitor | 3 | AG  | [15-16],[121-122],[452-453]                                                             |
| 7601 | ACE inhibitor | 2 | GH  | [193-194],[453-454]                                                                     |
| 7602 | ACE inhibitor | 1 | HL  | [281-282]                                                                               |
| 7603 | ACE inhibitor | 1 | GR  | [586-587]                                                                               |
| 7604 | ACE inhibitor | 1 | KG  | [10-11]                                                                                 |
| 7606 | ACE inhibitor | 3 | DA  | [293-294],[332-333],[482-483]                                                           |
| 7607 | ACE inhibitor | 1 | GS  | [248-249]                                                                               |
| 7608 | ACE inhibitor | 3 | GV  | [47-48],[79-80],[125-126]                                                               |
| 7609 | ACE inhibitor | 2 | MG  | [161-162],[530-531]                                                                     |
| 7611 | ACE inhibitor | 1 | GK  | [82-83]                                                                                 |
| 7612 | ACE inhibitor | 3 | GT  | [338-339],[405-406],[469-470]                                                           |
| 7614 | ACE inhibitor | 2 | HG  | [194-195],[468-469]                                                                     |
| 7616 | ACE inhibitor | 1 | GG  | [5-6]                                                                                   |
| 7617 | ACE inhibitor | 1 | QG  | [124-125]                                                                               |
| 7618 | ACE inhibitor | 1 | SG  | [46-47]                                                                                 |
| 7619 | ACE inhibitor | 5 | LG  | [4-5],[402-403],[449-450],[585-586],[607-608]                                           |
| 7622 | ACE inhibitor | 1 | EG  | [88-89]                                                                                 |
| 7623 | ACE inhibitor | 5 | EA  | [120-121],[200-201],[359-360],[376-377],[432-433]                                       |
| 7624 | ACE inhibitor | 2 | NG  | [78-79],[216-217]                                                                       |
| 7626 | ACE inhibitor | 2 | IAK | [381-383],[490-492]                                                                     |
| 7682 | ACE inhibitor | 1 | NY  | [186-187]                                                                               |
| 7684 | ACE inhibitor | 2 | SY  | [184-185],[552-553]                                                                     |
| 7685 | ACE inhibitor | 1 | SF  | [550-551]                                                                               |
| 7691 | ACE inhibitor | 3 | KY  | [251-252],[349-350],[410-411]                                                           |
| 7692 | ACE inhibitor | 4 | KF  | [73-74],[297-298],[309-310],[344-345]                                                   |
| 7693 | ACE inhibitor | 4 | KL  | [36-37],[59-60],[379-380],[383-384]                                                     |
| 7698 | ACE inhibitor | 1 | NK  | [388-389]                                                                               |
| 7742 | ACE inhibitor | 1 | AR  | [13-14]                                                                                 |
| 7743 | ACE inhibitor | 3 | KA  | [138-139],[509-510],[594-595]                                                           |
| 7746 | ACE inhibitor | 1 | LVE | [37-39]                                                                                 |
| 7752 | ACE inhibitor | 3 | EY  | [44-45],[75-76],[243-244]                                                               |
| 7810 | ACE inhibitor | 2 | KP  | [190-191],[459-460]                                                                     |
| 7824 | ACE inhibitor | 1 | IAE | [357-359]                                                                               |
| 7826 | ACE inhibitor | 2 | EI  | [231-232],[398-399]                                                                     |
| 7828 | ACE inhibitor | 2 | EV  | [277-278],[314-315]                                                                     |

*Supplemental file*

|      |                  |   |      |                                                                                       |
|------|------------------|---|------|---------------------------------------------------------------------------------------|
| 7829 | ACE inhibitor    | 5 | VE   | [38-39],[276-277],[287-288],[391-392],[420-421]                                       |
| 7830 | ACE inhibitor    | 4 | TE   | [166-167],[256-257],[375-376],[542-543]                                               |
| 7831 | ACE inhibitor    | 4 | LQ   | [105-106],[259-260],[503-504],[546-547]                                               |
| 7832 | ACE inhibitor    | 5 | LN   | [95-96],[102-103],[107-108],[150-151],[279-280]                                       |
| 7833 | ACE inhibitor    | 1 | PT   | [455-456]                                                                             |
| 7834 | ACE inhibitor    | 2 | TQ   | [112-113],[439-440]                                                                   |
| 7836 | ACE inhibitor    | 1 | PP   | [528-529]                                                                             |
| 7839 | ACE inhibitor    | 1 | ME   | [221-222]                                                                             |
| 7840 | ACE inhibitor    | 6 | EK   | [9-10],[137-138],[155-156],[167-168],[288-289],[348-349]                              |
| 7841 | ACE inhibitor    | 2 | KE   | [347-348],[493-494]                                                                   |
| 7842 | ACE inhibitor    | 2 | HP   | [454-455],[512-513]                                                                   |
| 8193 | ACE inhibitor    | 8 | AI   | [132-133],[333-334],[336-337],[377-378],[483-484],[565-566],[577-578],[595-596]       |
| 8404 | ACE inhibitor    | 1 | VLKP | [188-191]                                                                             |
| 8951 | ACE inhibitor    | 1 | AV   | [433-434]                                                                             |
| 8968 | ACE inhibitor    | 1 | ASL  | [473-475]                                                                             |
| 9037 | ACE inhibitor    | 1 | GKV  | [82-84]                                                                               |
| 9047 | ACE inhibitor    | 1 | AQL  | [66-68]                                                                               |
| 9051 | ACE inhibitor    | 1 | RPP  | [527-529]                                                                             |
| 9053 | ACE inhibitor    | 1 | FYN  | [600-602]                                                                             |
| 9065 | ACE inhibitor    | 1 | GVY  | [47-49]                                                                               |
| 9068 | ACE inhibitor    | 1 | VTR  | [283-285]                                                                             |
| 9073 | ACE inhibitor    | 4 | TP   | [70-71],[261-262],[339-340],[470-471]                                                 |
| 9074 | ACE inhibitor    | 1 | DF   | [599-600]                                                                             |
| 9075 | ACE inhibitor    | 2 | DM   | [160-161],[428-429]                                                                   |
| 9077 | ACE inhibitor    | 1 | YV   | [187-188]                                                                             |
| 9078 | ACE inhibitor    | 2 | YE   | [116-117],[252-253]                                                                   |
| 9079 | ACE inhibitor    | 8 | IL   | [101-102],[142-143],[196-197],[198-199],[330-331],[443-444],[464-465],[580-581]       |
| 9173 | ACE inhibitor    | 3 | RG   | [99-100],[180-181],[247-248]                                                          |
| 9184 | ACE inhibitor    | 3 | ST   | [91-92],[255-256],[562-563]                                                           |
| 9185 | ACE inhibitor    | 2 | YN   | [185-186],[601-602]                                                                   |
| 9191 | ACE inhibitor    | 1 | GHG  | [193-195]                                                                             |
| 9213 | ACE inhibitor    | 6 | LR   | [179-180],[305-306],[396-397],[487-488],[515-516],[590-591]                           |
| 8268 | antibacterial    | 1 | YVL  | [187-189]                                                                             |
| 2882 | immunomodulating | 1 | YG   | [404-405]                                                                             |
| 3356 | stimulating      | 1 | LLL  | [2-4]                                                                                 |
| 8320 | stimulating      | 9 | VL   | [23-24],[94-95],[104-105],[188-189],[278-279],[395-396],[400-401],[448-449],[522-523] |
| 8321 | stimulating      | 5 | LV   | [37-38],[54-55],[227-228],[282-283],[532-533]                                         |
| 8322 | stimulating      | 6 | IV   | [237-238],[275-276],[390-391],[399-400],[521-522],[539-540]                           |
| 8323 | stimulating      | 8 | IL   | [101-102],[142-143],[196-197],[198-199],[330-331],[443-444],[464-465],[580-581]       |
| 8324 | stimulating      | 9 | LI   | [24-25],[197-198],[206-207],[265-266],[301-302],[364-365],[380-381],[384-             |

*Supplemental file*

|      |                                           |   |     |                                                                               |
|------|-------------------------------------------|---|-----|-------------------------------------------------------------------------------|
|      |                                           |   |     | 385],[422-423]                                                                |
| 8325 | stimulating                               | 1 | II  | [442-443]                                                                     |
| 8326 | stimulating                               | 7 | LL  | [2-3],[3-4],[68-69],[143-144],[258-259],[304-305],[401-402]                   |
| 8330 | stimulating                               | 1 | SE  | [134-135]                                                                     |
| 3099 | immunostimulating                         | 1 | LGY | [402-404]                                                                     |
| 8310 | neuropeptide                              | 2 | YL  | [244-245],[350-351]                                                           |
| 2738 | regulating                                | 1 | LGY | [402-404]                                                                     |
| 3305 | antioxidative                             | 2 | LH  | [245-246],[511-512]                                                           |
| 3317 | antioxidative                             | 1 | HL  | [281-282]                                                                     |
| 7862 | antioxidative                             | 1 | IKK | [109-111]                                                                     |
| 7866 | antioxidative                             | 2 | AY  | [164-165],[325-326]                                                           |
| 7868 | antioxidative                             | 1 | ADF | [598-600]                                                                     |
| 7872 | antioxidative                             | 2 | LY  | [130-131],[505-506]                                                           |
| 7888 | antioxidative                             | 8 | EL  | [41-42],[205-206],[257-258],[300-301],[354-355],[421-422],[500-501],[514-515] |
| 7968 | antioxidative                             | 1 | YNY | [185-187]                                                                     |
| 7999 | antioxidative                             | 1 | LHR | [245-247]                                                                     |
| 8107 | antioxidative                             | 1 | IKL | [378-380]                                                                     |
| 8132 | antioxidative                             | 1 | KAI | [594-596]                                                                     |
| 8133 | antioxidative                             | 1 | KVI | [156-158]                                                                     |
| 8134 | antioxidative                             | 3 | KD  | [51-52],[159-160],[436-437]                                                   |
| 8139 | antioxidative                             | 2 | PEL | [40-42],[513-515]                                                             |
| 8150 | antioxidative                             | 1 | YVL | [187-189]                                                                     |
| 8215 | antioxidative                             | 1 | IR  | [423-424]                                                                     |
| 8216 | antioxidative                             | 2 | LKP | [189-191],[458-460]                                                           |
| 8217 | antioxidative                             | 7 | LK  | [35-36],[189-190],[250-251],[296-297],[343-344],[446-447],[458-459]           |
| 8218 | antioxidative                             | 2 | KP  | [190-191],[459-460]                                                           |
| 8224 | antioxidative                             | 3 | VY  | [48-49],[97-98],[115-116]                                                     |
| 8484 | antioxidative                             | 1 | LLR | [304-306]                                                                     |
| 8983 | antioxidative                             | 2 | GAA | [217-219],[608-610]                                                           |
| 9355 | antioxidative                             | 1 | LAC | [518-520]                                                                     |
| 9360 | antioxidative                             | 1 | LPM | [475-477]                                                                     |
| 9366 | antioxidative                             | 1 | KYL | [349-351]                                                                     |
| 3751 | bacterial permease ligand                 | 2 | KK  | [110-111],[492-493]                                                           |
| 8247 | inhibitor                                 | 1 | IR  | [423-424]                                                                     |
| 8249 | inhibitor                                 | 4 | KF  | [73-74],[297-298],[309-310],[344-345]                                         |
| 8250 | inhibitor                                 | 1 | EF  | [253-254]                                                                     |
| 8246 | hypotensive                               | 1 | IR  | [423-424]                                                                     |
| 8248 | hypotensive                               | 4 | KF  | [73-74],[297-298],[309-310],[344-345]                                         |
| 8251 | hypotensive                               | 1 | EF  | [253-254]                                                                     |
| 4005 | activating ubiquitin-mediated proteolysis | 2 | RA  | [14-15],[234-235]                                                             |
| 4006 | activating ubiquitin-mediated proteolysis | 7 | LA  | [12-13],[64-65],[163-164],[351-352],[430-431],[501-502],[518-519]             |
| 3170 | dipeptidyl peptidase IV inhibitor         | 1 | PP  | [528-529]                                                                     |
| 3171 | dipeptidyl peptidase IV inhibitor         | 1 | MP  | [415-416]                                                                     |
| 3172 | dipeptidyl peptidase IV inhibitor         | 5 | VA  | [307-308],[434-435],[548-549],[570-571],[576-577]                             |
| 3173 | dipeptidyl peptidase IV                   | 1 | MA  | [485-486]                                                                     |

*Supplemental file*

|      |                                   |   |     |                                                                   |
|------|-----------------------------------|---|-----|-------------------------------------------------------------------|
|      | inhibitor                         |   |     |                                                                   |
| 3174 | dipeptidyl peptidase IV inhibitor | 3 | KA  | [138-139],[509-510],[594-595]                                     |
| 3175 | dipeptidyl peptidase IV inhibitor | 7 | LA  | [12-13],[64-65],[163-164],[351-352],[430-431],[501-502],[518-519] |
| 3176 | dipeptidyl peptidase IV inhibitor | 2 | FA  | [85-86],[212-213]                                                 |
| 3177 | dipeptidyl peptidase IV inhibitor | 3 | AP  | [86-87],[235-236],[294-295]                                       |
| 3179 | dipeptidyl peptidase IV inhibitor | 5 | PA  | [56-57],[324-325],[335-336],[340-341],[471-472]                   |
| 3180 | dipeptidyl peptidase IV inhibitor | 3 | LP  | [7-8],[465-466],[475-476]                                         |
| 3181 | dipeptidyl peptidase IV inhibitor | 3 | VP  | [55-56],[238-239],[368-369]                                       |
| 3182 | dipeptidyl peptidase IV inhibitor | 7 | LL  | [2-3],[3-4],[68-69],[143-144],[258-259],[304-305],[401-402]       |
| 3183 | dipeptidyl peptidase IV inhibitor | 1 | VV  | [80-81]                                                           |
| 3184 | dipeptidyl peptidase IV inhibitor | 3 | HA  | [480-481],[567-568],[597-598]                                     |
| 8304 | dipeptidyl peptidase IV inhibitor | 1 | IPA | [334-336]                                                         |
| 8501 | dipeptidyl peptidase IV inhibitor | 1 | IP  | [334-335]                                                         |
| 8503 | dipeptidyl peptidase IV inhibitor | 4 | TP  | [70-71],[261-262],[339-340],[470-471]                             |
| 8505 | dipeptidyl peptidase IV inhibitor | 2 | SP  | [210-211],[582-583]                                               |
| 8518 | dipeptidyl peptidase IV inhibitor | 3 | RP  | [323-324],[424-425],[527-528]                                     |
| 8519 | dipeptidyl peptidase IV inhibitor | 2 | KP  | [190-191],[459-460]                                               |
| 8520 | dipeptidyl peptidase IV inhibitor | 2 | HP  | [454-455],[512-513]                                               |
| 8521 | dipeptidyl peptidase IV inhibitor | 1 | YP  | [49-50]                                                           |
| 8524 | dipeptidyl peptidase IV inhibitor | 4 | GA  | [122-123],[181-182],[217-218],[608-609]                           |
| 8525 | dipeptidyl peptidase IV inhibitor | 5 | IA  | [357-358],[365-366],[381-382],[490-491],[536-537]                 |
| 8526 | dipeptidyl peptidase IV inhibitor | 2 | RA  | [14-15],[234-235]                                                 |
| 8529 | dipeptidyl peptidase IV inhibitor | 2 | EP  | [39-40],[494-495]                                                 |
| 8530 | dipeptidyl peptidase IV inhibitor | 2 | NP  | [393-394],[603-604]                                               |
| 8531 | dipeptidyl peptidase IV inhibitor | 4 | TA  | [28-29],[62-63],[372-373],[564-565]                               |
| 8555 | dipeptidyl peptidase IV inhibitor | 3 | FL  | [229-230],[298-299],[445-446]                                     |
| 8557 | dipeptidyl peptidase IV inhibitor | 1 | HL  | [281-282]                                                         |
| 8558 | dipeptidyl peptidase IV inhibitor | 6 | EK  | [9-10],[137-138],[155-156],[167-168],[288-289],[348-349]          |
| 8559 | dipeptidyl peptidase IV           | 6 | AL  | [63-64],[342-343],[363-364],[486-                                 |



## Supplemental file

|      |                                   |   |    |                                                                                         |
|------|-----------------------------------|---|----|-----------------------------------------------------------------------------------------|
|      | inhibitor                         |   |    | 487],[502-503],[510-511]                                                                |
| 8560 | dipeptidyl peptidase IV inhibitor | 6 | SL | [226-227],[249-250],[457-458],[474-475],[558-559],[589-590]                             |
| 8561 | dipeptidyl peptidase IV inhibitor | 4 | GL | [6-7],[11-12],[162-163],[531-532]                                                       |
| 8637 | dipeptidyl peptidase IV inhibitor | 9 | AA | [65-66],[218-219],[341-342],[360-361],[472-473],[571-572],[572-573],[609-610],[610-611] |
| 8638 | dipeptidyl peptidase IV inhibitor | 3 | PL | [53-54],[295-296],[604-605]                                                             |
| 8679 | dipeptidyl peptidase IV inhibitor | 1 | WI | [329-330]                                                                               |
| 8687 | dipeptidyl peptidase IV inhibitor | 1 | WS | [317-318]                                                                               |
| 8696 | dipeptidyl peptidase IV inhibitor | 1 | YT | [165-166]                                                                               |
| 8757 | dipeptidyl peptidase IV inhibitor | 3 | AD | [352-353],[481-482],[598-599]                                                           |
| 8758 | dipeptidyl peptidase IV inhibitor | 7 | AE | [29-30],[139-140],[213-214],[242-243],[358-359],[413-414],[431-432]                     |
| 8759 | dipeptidyl peptidase IV inhibitor | 1 | AF | [613-614]                                                                               |
| 8760 | dipeptidyl peptidase IV inhibitor | 3 | AG | [15-16],[121-122],[452-453]                                                             |
| 8762 | dipeptidyl peptidase IV inhibitor | 5 | AS | [366-367],[473-474],[549-550],[568-569],[611-612]                                       |
| 8763 | dipeptidyl peptidase IV inhibitor | 4 | AT | [27-28],[57-58],[182-183],[201-202]                                                     |
| 8764 | dipeptidyl peptidase IV inhibitor | 1 | AV | [433-434]                                                                               |
| 8765 | dipeptidyl peptidase IV inhibitor | 2 | AY | [164-165],[325-326]                                                                     |
| 8767 | dipeptidyl peptidase IV inhibitor | 1 | DP | [52-53]                                                                                 |
| 8770 | dipeptidyl peptidase IV inhibitor | 1 | EG | [88-89]                                                                                 |
| 8772 | dipeptidyl peptidase IV inhibitor | 2 | EI | [231-232],[398-399]                                                                     |
| 8774 | dipeptidyl peptidase IV inhibitor | 3 | ET | [222-223],[438-439],[525-526]                                                           |
| 8775 | dipeptidyl peptidase IV inhibitor | 2 | EV | [277-278],[314-315]                                                                     |
| 8777 | dipeptidyl peptidase IV inhibitor | 3 | EY | [44-45],[75-76],[243-244]                                                               |
| 8783 | dipeptidyl peptidase IV inhibitor | 1 | GG | [5-6]                                                                                   |
| 8784 | dipeptidyl peptidase IV inhibitor | 2 | GH | [193-194],[453-454]                                                                     |
| 8785 | dipeptidyl peptidase IV inhibitor | 4 | GI | [16-17],[89-90],[100-101],[195-196]                                                     |
| 8786 | dipeptidyl peptidase IV inhibitor | 3 | GV | [47-48],[79-80],[125-126]                                                               |
| 8788 | dipeptidyl peptidase IV inhibitor | 1 | GY | [403-404]                                                                               |
| 8790 | dipeptidyl peptidase IV inhibitor | 1 | HE | [291-292]                                                                               |

*Supplemental file*

|      |                                   |   |    |                                                                                         |
|------|-----------------------------------|---|----|-----------------------------------------------------------------------------------------|
| 8794 | dipeptidyl peptidase IV inhibitor | 1 | HR | [246-247]                                                                               |
| 8800 | dipeptidyl peptidase IV inhibitor | 3 | IH | [467-468],[566-567],[596-597]                                                           |
| 8801 | dipeptidyl peptidase IV inhibitor | 1 | II | [442-443]                                                                               |
| 8802 | dipeptidyl peptidase IV inhibitor | 8 | IL | [101-102],[142-143],[196-197],[198-199],[330-331],[443-444],[464-465],[580-581]         |
| 8803 | dipeptidyl peptidase IV inhibitor | 1 | IM | [484-485]                                                                               |
| 8805 | dipeptidyl peptidase IV inhibitor | 7 | IQ | [207-208],[232-233],[240-241],[263-264],[302-303],[426-427],[498-499]                   |
| 8806 | dipeptidyl peptidase IV inhibitor | 1 | IR | [423-424]                                                                               |
| 8807 | dipeptidyl peptidase IV inhibitor | 1 | IW | [316-317]                                                                               |
| 8808 | dipeptidyl peptidase IV inhibitor | 2 | KE | [347-348],[493-494]                                                                     |
| 8809 | dipeptidyl peptidase IV inhibitor | 4 | KF | [73-74],[297-298],[309-310],[344-345]                                                   |
| 8810 | dipeptidyl peptidase IV inhibitor | 1 | KG | [10-11]                                                                                 |
| 8812 | dipeptidyl peptidase IV inhibitor | 5 | KI | [18-19],[267-268],[389-390],[463-464],[579-580]                                         |
| 8813 | dipeptidyl peptidase IV inhibitor | 2 | KK | [110-111],[492-493]                                                                     |
| 8815 | dipeptidyl peptidase IV inhibitor | 2 | KS | [557-558],[561-562]                                                                     |
| 8816 | dipeptidyl peptidase IV inhibitor | 5 | KT | [111-112],[128-129],[146-147],[321-322],[541-542]                                       |
| 8817 | dipeptidyl peptidase IV inhibitor | 6 | KV | [22-23],[83-84],[156-157],[289-290],[447-448],[575-576]                                 |
| 8819 | dipeptidyl peptidase IV inhibitor | 3 | KY | [251-252],[349-350],[410-411]                                                           |
| 8820 | dipeptidyl peptidase IV inhibitor | 2 | LH | [245-246],[511-512]                                                                     |
| 8821 | dipeptidyl peptidase IV inhibitor | 9 | LI | [24-25],[197-198],[206-207],[265-266],[301-302],[364-365],[380-381],[384-385],[422-423] |
| 8822 | dipeptidyl peptidase IV inhibitor | 2 | LM | [33-34],[605-606]                                                                       |
| 8823 | dipeptidyl peptidase IV inhibitor | 5 | LN | [95-96],[102-103],[107-108],[150-151],[279-280]                                         |
| 8824 | dipeptidyl peptidase IV inhibitor | 5 | LT | [60-61],[69-70],[144-145],[355-356],[559-560]                                           |
| 8825 | dipeptidyl peptidase IV inhibitor | 5 | LV | [37-38],[54-55],[227-228],[282-283],[532-533]                                           |
| 8826 | dipeptidyl peptidase IV inhibitor | 1 | ME | [221-222]                                                                               |
| 8828 | dipeptidyl peptidase IV inhibitor | 2 | MG | [161-162],[530-531]                                                                     |
| 8830 | dipeptidyl peptidase IV inhibitor | 2 | MI | [407-408],[497-498]                                                                     |
| 8831 | dipeptidyl peptidase IV inhibitor | 1 | MK | [556-557]                                                                               |

*Supplemental file*

|      |                                   |   |    |                                                                     |
|------|-----------------------------------|---|----|---------------------------------------------------------------------|
| 8832 | dipeptidyl peptidase IV inhibitor | 4 | ML | [34-35],[429-430],[517-518],[606-607]                               |
| 8834 | dipeptidyl peptidase IV inhibitor | 1 | MN | [215-216]                                                           |
| 8835 | dipeptidyl peptidase IV inhibitor | 1 | MQ | [118-119]                                                           |
| 8836 | dipeptidyl peptidase IV inhibitor | 1 | MR | [477-478]                                                           |
| 8837 | dipeptidyl peptidase IV inhibitor | 2 | MV | [93-94],[370-371]                                                   |
| 8839 | dipeptidyl peptidase IV inhibitor | 1 | NA | [451-452]                                                           |
| 8841 | dipeptidyl peptidase IV inhibitor | 1 | NE | [204-205]                                                           |
| 8843 | dipeptidyl peptidase IV inhibitor | 2 | NG | [78-79],[216-217]                                                   |
| 8844 | dipeptidyl peptidase IV inhibitor | 2 | NH | [151-152],[280-281]                                                 |
| 8845 | dipeptidyl peptidase IV inhibitor | 2 | NL | [178-179],[545-546]                                                 |
| 8847 | dipeptidyl peptidase IV inhibitor | 1 | NN | [602-603]                                                           |
| 8850 | dipeptidyl peptidase IV inhibitor | 2 | NT | [31-32],[374-375]                                                   |
| 8851 | dipeptidyl peptidase IV inhibitor | 5 | NV | [96-97],[103-104],[114-115],[270-271],[286-287]                     |
| 8853 | dipeptidyl peptidase IV inhibitor | 1 | NY | [186-187]                                                           |
| 8854 | dipeptidyl peptidase IV inhibitor | 1 | PF | [211-212]                                                           |
| 8857 | dipeptidyl peptidase IV inhibitor | 7 | PI | [71-72],[236-237],[239-240],[262-263],[425-426],[460-461],[466-467] |
| 8858 | dipeptidyl peptidase IV inhibitor | 1 | PK | [50-51]                                                             |
| 8859 | dipeptidyl peptidase IV inhibitor | 3 | PM | [369-370],[476-477],[529-530]                                       |
| 8863 | dipeptidyl peptidase IV inhibitor | 1 | PT | [455-456]                                                           |
| 8864 | dipeptidyl peptidase IV inhibitor | 4 | PV | [191-192],[394-395],[416-417],[419-420]                             |
| 8867 | dipeptidyl peptidase IV inhibitor | 3 | QA | [241-242],[272-273],[362-363]                                       |
| 8868 | dipeptidyl peptidase IV inhibitor | 2 | QD | [174-175],[427-428]                                                 |
| 8869 | dipeptidyl peptidase IV inhibitor | 3 | QE | [119-120],[154-155],[499-500]                                       |
| 8870 | dipeptidyl peptidase IV inhibitor | 2 | QF | [208-209],[319-320]                                                 |
| 8871 | dipeptidyl peptidase IV inhibitor | 1 | QG | [124-125]                                                           |
| 8873 | dipeptidyl peptidase IV inhibitor | 1 | QI | [274-275]                                                           |
| 8874 | dipeptidyl peptidase IV inhibitor | 5 | QL | [67-68],[106-107],[264-265],[303-304],[504-505]                     |
| 8875 | dipeptidyl peptidase IV inhibitor | 3 | QN | [113-114],[440-441],[544-545]                                       |

*Supplemental file*

---

|      |                                   |   |    |                                                 |
|------|-----------------------------------|---|----|-------------------------------------------------|
| 8876 | dipeptidyl peptidase IV inhibitor | 1 | QQ | [173-174]                                       |
| 8877 | dipeptidyl peptidase IV inhibitor | 1 | QS | [225-226]                                       |
| 8878 | dipeptidyl peptidase IV inhibitor | 1 | QT | [260-261]                                       |
| 8879 | dipeptidyl peptidase IV inhibitor | 1 | QV | [547-548]                                       |
| 8880 | dipeptidyl peptidase IV inhibitor | 1 | QW | [328-329]                                       |
| 8882 | dipeptidyl peptidase IV inhibitor | 3 | RG | [99-100],[180-181],[247-248]                    |
| 8884 | dipeptidyl peptidase IV inhibitor | 1 | RI | [141-142]                                       |
| 8886 | dipeptidyl peptidase IV inhibitor | 2 | RL | [584-585],[587-588]                             |
| 8887 | dipeptidyl peptidase IV inhibitor | 2 | RM | [496-497],[516-517]                             |
| 8888 | dipeptidyl peptidase IV inhibitor | 2 | RN | [285-286],[488-489]                             |
| 8891 | dipeptidyl peptidase IV inhibitor | 1 | SF | [550-551]                                       |
| 8892 | dipeptidyl peptidase IV inhibitor | 1 | SH | [554-555]                                       |
| 8894 | dipeptidyl peptidase IV inhibitor | 5 | SK | [21-22],[176-177],[386-387],[409-410],[593-594] |
| 8895 | dipeptidyl peptidase IV inhibitor | 2 | SV | [367-368],[569-570]                             |
| 8897 | dipeptidyl peptidase IV inhibitor | 2 | SY | [184-185],[552-553]                             |
| 8899 | dipeptidyl peptidase IV inhibitor | 4 | TE | [166-167],[256-257],[375-376],[542-543]         |
| 8903 | dipeptidyl peptidase IV inhibitor | 2 | TI | [356-357],[535-536]                             |
| 8904 | dipeptidyl peptidase IV inhibitor | 5 | TK | [58-59],[145-146],[223-224],[462-463],[560-561] |
| 8905 | dipeptidyl peptidase IV inhibitor | 3 | TL | [1-2],[32-33],[129-130]                         |
| 8906 | dipeptidyl peptidase IV inhibitor | 2 | TM | [92-93],[406-407]                               |
| 8907 | dipeptidyl peptidase IV inhibitor | 1 | TN | [269-270]                                       |
| 8908 | dipeptidyl peptidase IV inhibitor | 2 | TQ | [112-113],[439-440]                             |
| 8909 | dipeptidyl peptidase IV inhibitor | 4 | TR | [147-148],[284-285],[322-323],[526-527]         |
| 8910 | dipeptidyl peptidase IV inhibitor | 2 | TS | [183-184],[456-457]                             |
| 8911 | dipeptidyl peptidase IV inhibitor | 3 | TT | [61-62],[534-535],[563-564]                     |
| 8912 | dipeptidyl peptidase IV inhibitor | 1 | TV | [202-203]                                       |
| 8916 | dipeptidyl peptidase IV inhibitor | 5 | VE | [38-39],[276-277],[287-288],[391-392],[420-421] |
| 8917 | dipeptidyl peptidase IV inhibitor | 2 | VF | [84-85],[228-229]                               |

---

*Supplemental file*

---

|      |                                   |   |      |                                                                                       |
|------|-----------------------------------|---|------|---------------------------------------------------------------------------------------|
| 8918 | dipeptidyl peptidase IV inhibitor | 2 | VG   | [81-82],[192-193]                                                                     |
| 8919 | dipeptidyl peptidase IV inhibitor | 2 | VH   | [290-291],[479-480]                                                                   |
| 8920 | dipeptidyl peptidase IV inhibitor | 2 | VI   | [157-158],[315-316]                                                                   |
| 8921 | dipeptidyl peptidase IV inhibitor | 1 | VK   | [540-541]                                                                             |
| 8922 | dipeptidyl peptidase IV inhibitor | 9 | VL   | [23-24],[94-95],[104-105],[188-189],[278-279],[395-396],[400-401],[448-449],[522-523] |
| 8924 | dipeptidyl peptidase IV inhibitor | 1 | VN   | [203-204]                                                                             |
| 8925 | dipeptidyl peptidase IV inhibitor | 1 | VQ   | [271-272]                                                                             |
| 8927 | dipeptidyl peptidase IV inhibitor | 3 | VT   | [283-284],[371-372],[533-534]                                                         |
| 8929 | dipeptidyl peptidase IV inhibitor | 3 | VY   | [48-49],[97-98],[115-116]                                                             |
| 8932 | dipeptidyl peptidase IV inhibitor | 2 | YA   | [76-77],[131-132]                                                                     |
| 8934 | dipeptidyl peptidase IV inhibitor | 2 | YE   | [116-117],[252-253]                                                                   |
| 8936 | dipeptidyl peptidase IV inhibitor | 1 | YG   | [404-405]                                                                             |
| 8940 | dipeptidyl peptidase IV inhibitor | 2 | YL   | [244-245],[350-351]                                                                   |
| 8941 | dipeptidyl peptidase IV inhibitor | 1 | YM   | [506-507]                                                                             |
| 8942 | dipeptidyl peptidase IV inhibitor | 2 | YN   | [185-186],[601-602]                                                                   |
| 8944 | dipeptidyl peptidase IV inhibitor | 2 | YR   | [98-99],[326-327]                                                                     |
| 8945 | dipeptidyl peptidase IV inhibitor | 2 | YS   | [45-46],[553-554]                                                                     |
| 8946 | dipeptidyl peptidase IV inhibitor | 1 | YV   | [187-188]                                                                             |
| 9334 | dipeptidyl peptidase IV inhibitor | 1 | VAAA | [570-573]                                                                             |

---
